# Supplementary material for: A new calcite reference material for in situ oxygen isotope analysis using secondary ion mass spectrometry: development and application constraints
Source: Royal Society of Chemistry journal article supplement (doi:10.1039/d4ja00345d), 2024-12-03
Supplement: d4ja00345d1.xlsx [file d4ja00345d1.xlsx]

## Sheet: Table S1
		Primary ion beam	16O/Coeff		18O/Coeff		Secondary yield	18O/16O			δ18Ouncorrected					δ18Ocorrected by VS001/1-A
Session1	Fragments	nA	L'2		H'2		16O cps/primary ion	H'2/L'2	SE(%)		‰	Average(‰)	SD(‰)		IMF VS001/1-A(‰)	‰	Average(‰)
															-4.63836
NBS18@01		1.48837	2062082000	0.232872	4143705	0.230913	1.38546e+09	0.00200948	0.00879684		-27.9228	-27.6913	0.362591			-23.3929	-23.1603
NBS18@03		1.41022	1949822000	0.170441	3918712	0.17076	1.38264e+09	0.00200988	0.00803606		-27.7264					-23.1956
NBS18@04		1.39011	1998387000	0.138593	4017392	0.137848	1.43757e+09	0.00201031	0.0062917		-27.5213					-22.9896
NBS18@05		1.40443	1938013000	0.198628	3894607	0.199873	1.37993e+09	0.00200948	0.00796898		-27.9209					-23.391
NBS18@07		1.32455	1850083000	0.118012	3718054	0.120743	1.39676e+09	0.00200967	0.00826935		-27.8309					-23.3006
NBS18@08		1.19508	1690986000	0.146623	3402571	0.14957	1.41496e+09	0.00201204	0.00703162		-26.682					-22.1463
NBS18@09		1.18788	1659929000	0.16353	3335805	0.167397	1.39738e+09	0.0020096	0.00690515		-27.8614					-23.3312
NBS18@10		1.18256	1662014000	0.109168	3340782	0.109243	1.40543e+09	0.00201008	0.0069		-27.6311					-23.0999
NBS18@11		1.21166	1713394000	0.15028	3443005	0.149685	1.41408e+09	0.00200939	0.00679671		-27.9649					-23.4352
NBS18@12		1.20814	1679122000	0.151755	3374746	0.148126	1.38984e+09	0.00200958	0.00859568		-27.871					-23.3409
NBS18@2		1.48884	2057231000	0.154457	4135029	0.15503	1.38177e+09	0.00201	0.00652901		-27.6712					-23.1402
VS001/1-A@01		1.48743	2014588000	0.105975	4093928	0.110712	1.35441e+09	0.00203212	0.00711779		-16.9693	-16.9908	0.284111			-12.3884	-12.41
VS001/1-A@010		1.19054	1623860000	0.15849	3297892	0.161866	1.36397e+09	0.0020308	0.00694484		-17.6108					-13.0329
VS001/1-A@011		1.18687	1622798000	0.167578	3296998	0.166052	1.3673e+09	0.00203181	0.00694579		-17.1217					-12.5415
VS001/1-A@012		1.16621	1606292000	0.145732	3263453	0.147186	1.37736e+09	0.00203167	0.00949143		-17.1885					-12.6086
VS001/1-A@03		1.39848	1896097000	0.152897	3854303	0.153562	1.35583e+09	0.00203276	0.00992084		-16.6622					-12.0798
VS001/1-A@04		1.40122	1879002000	0.174188	3818189	0.173628	1.34098e+09	0.00203214	0.00731808		-16.9606					-12.3797
VS001/1-A@06		1.3898	1849372000	0.151377	3759622	0.148858	1.33068e+09	0.00203294	0.00650405		-16.5712					-11.9885
VS001/1-A@08		1.36852	1817276000	0.0892293	3692991	0.0930299	1.32791e+09	0.00203206	0.00779903		-16.9988					-12.4181
VS001/1-A@09		1.21065	1669541000	0.127446	3393107	0.128626	1.37905e+09	0.00203262	0.00750943		-16.7299					-12.1479
VS001/1-A@14		1.20877	1681841000	0.186792	3416944	0.188428	1.39137e+09	0.00203167	0.00896078		-17.1885					-12.6086
VS001/1-A@15		1.22027	1678132000	0.10087	3411453	0.103791	1.37521e+09	0.00203274	0.00682817		-16.6709					-12.0886
VS001/1-A@17		1.19938	1644609000	0.146926	3341218	0.147678	1.37121e+09	0.00203172	0.00689963		-17.1648					-12.5848
VS001/1-A@2		1.48665	1982759000	0.0701824	4028902	0.0676374	1.33371e+09	0.00203197	0.00951157		-17.0433					-12.4628
WS-1@01	1	1.47343	2041604000	0.208739	4132069	0.209487	1.38562e+09	0.00202393	0.00711488		-20.9307	-21.2067	0.130123			-16.3683	-16.6323				-16.4369	0.250856
WS-1@02	1	1.49424	2043968000	0.124338	4135886	0.121659	1.3679e+09	0.00202346	0.00744658		-21.1591					-16.5977
WS-1@03	1	1.42539	1950236000	0.130929	3946532	0.131828	1.36821e+09	0.00202374	0.00634801		-21.0222					-16.4601
WS-1@04	1	1.39699	1927498000	0.199897	3900680	0.19667	1.37975e+09	0.00202363	0.00638524		-21.0778					-16.516
WS-1@05	1	1.39598	1924246000	0.15357	3893366	0.152699	1.37842e+09	0.00202332	0.00693229		-21.2263					-16.6652
WS-1@06	1	1.39254	1898858000	0.15271	3842053	0.144937	1.3636e+09	0.00202334	0.00643381		-21.2181					-16.657
WS-1@07	1	1.37431	1897436000	0.115439	3836984	0.127875	1.38065e+09	0.00202378	0.00643807		-21.0038					-16.4417
WS-1@08	1	1.39731	1912492000	0.180854	3869645	0.177545	1.3687e+09	0.00202345	0.0071495		-21.1644					-16.603
WS-1@09	1	1.36437	1873474000	0.106936	3790841	0.10524	1.37314e+09	0.00202343	0.00647716		-21.176					-16.6147
WS-1@10	1	1.37267	1857835000	0.155994	3759132	0.155962	1.35345e+09	0.00202339	0.00650445		-21.191					-16.6298
WS-1@11	2	1.32189	1816100000	0.139644	3673985	0.140749	1.37386e+09	0.00202301	0.00657945		-21.3792					-16.8188
WS-1@12	2	1.20079	1690670000	0.193182	3421177	0.196296	1.40796e+09	0.00202354	0.00862513		-21.1199					-16.5583
WS-1@13	2	1.19954	1690632000	0.191279	3420564	0.191023	1.4094e+09	0.0020233	0.00681903		-21.234					-16.673
WS-1@14	2	1.19563	1672030000	0.141972	3382467	0.134975	1.39845e+09	0.00202327	0.0111312		-21.251					-16.69
WS-1@15	2	1.18906	1672293000	0.132803	3383253	0.139902	1.4064e+09	0.00202283	0.0088205		-21.4624					-16.9024
WS-1@16	2	1.18264	1641618000	0.155892	3321229	0.155267	1.38809e+09	0.00202314	0.00692367		-21.3119					-16.7513
WS-1@17	2	1.17404	1642296000	0.154526	3322446	0.152407	1.39885e+09	0.00202316	0.00691908		-21.3027					-16.742
WS-1@19	2	1.20087	1666959000	0.139569	3373032	0.136669	1.38813e+09	0.0020233	0.00874688		-21.2369					-16.6759
WS-1@20	2	1.20329	1696990000	0.111618	3432659	0.113764	1.41029e+09	0.00202306	0.00847771		-21.355					-16.7945
WS-1@21	2	1.16825	1641645000	0.146613	3322257	0.147422	1.40522e+09	0.00202343	0.0107645		-21.1731					-16.6118
WS-1@22	2	1.18405	1658245000	0.166627	3355698	0.165025	1.40049e+09	0.00202365	0.00688823		-21.0696					-16.5078
		Primary ion beam	16O/Coeff		18O/Coeff		Secondary yield	18O/16O			δ18Ouncorrected					δ18Ocorrected by VS001/1-A
Session2	Fragments	nA	L'2		H'2		16O cps/primary ion	H'2/L'2	SE(%)		‰	Average(‰)	SD(‰)		IMF VS001/1-A(‰)	‰	Average(‰)
															-1.24279
NBS18@01		1.10746	2147496000	0.154113	4328237	0.15419	1.93912e+09	0.00201548	0.00606141		-25.0189	-24.6229	0.303228			-23.8057	-23.4092
NBS18@02		1.06678	2091767000	0.173957	4217886	0.173424	1.96082e+09	0.00201642	0.0080567		-24.5632					-23.3494
NBS18@03		1.02767	2058133000	0.166449	4149609	0.164608	2.00273e+09	0.00201629	0.00619059		-24.6265					-23.4129
NBS18@04		1.01757	2020618000	0.195933	4075347	0.190287	1.98572e+09	0.002017	0.00723559		-24.2831					-23.069
VS001/1-A@01		1.08955	2057036000	0.137092	4193282	0.136087	1.88798e+09	0.00203843	0.00618708		-13.9174	-13.6374	0.228966			-12.6904	-12.41
VS001/1-A@2		1.09471	2066663000	0.174485	4213263	0.169545	1.88787e+09	0.00203868	0.0084622		-13.7955					-12.5683
VS001/1-A@03		1.09322	2059999000	0.148152	4200735	0.145761	1.88434e+09	0.00203908	0.00615285		-13.6054					-12.378
VS001/1-A@04		1.06568	2045865000	0.134227	4173693	0.125664	1.91977e+09	0.00203981	0.0088548		-13.2517					-12.0239
VS001/1-A@05		1.00498	1972822000	0.155956	4022371	0.154795	1.96305e+09	0.00203889	0.00739601		-13.6934					-12.4661
VS001/1-A@06		1.01476	1979721000	0.141578	4036979	0.138442	1.95093e+09	0.00203917	0.00821322		-13.5609					-12.3334
WS-1@01	3	1.07719	2103690000	0.157944	4271769	0.15644	1.95295e+09	0.00203061	0.00686629		-17.7008	-17.5923	0.211384			-16.4784	-16.3699
WS-1@02	3	1.06506	2104893000	0.156005	4273884	0.157654	1.97632e+09	0.00203063	0.0110414		-17.6925					-16.4702
WS-1@03	3	1.07719	2103650000	0.147266	4272012	0.147521	1.95291e+09	0.00203084	0.00610124		-17.588					-16.3656
WS-1@04	3	1.0649	2102610000	0.183818	4270214	0.177775	1.97446e+09	0.00203101	0.00749638		-17.5068					-16.2842
WS-1@05	3	1.05481	2106268000	0.148129	4276258	0.152036	1.99682e+09	0.00203046	0.0080871		-17.7733					-16.5511
WS-1@06	3	1.07656	2117707000	0.157673	4300079	0.157762	1.96711e+09	0.00203061	0.00608128		-17.7022					-16.4799
WS-1@07	3	1.06217	2103509000	0.120273	4271614	0.115708	1.9804e+09	0.0020306	0.00908963		-17.7051					-16.4828
WS-1@08	3	1.07382	2123866000	0.162789	4313294	0.159289	1.97786e+09	0.00203073	0.00820708		-17.6417					-16.4194
WS-1@09	4	1.06592	2095596000	0.158408	4256317	0.150099	1.966e+09	0.00203089	0.00896208		-17.5629					-16.3404
WS-1@10	4	1.08297	2126007000	0.164136	4317505	0.161857	1.96312e+09	0.00203088	0.00621018		-17.5697					-16.3472
WS-1@11	4	1.05426	2091535000	0.126778	4246564	0.124325	1.98388e+09	0.00203036	0.00841439		-17.8217					-16.5995
WS-1@12	4	1.06475	2119786000	0.17446	4307428	0.173457	1.99088e+09	0.00203195	0.00607609		-17.0535					-15.8304
WS-1@13	4	1.07218	2101582000	0.156794	4268036	0.15139	1.96011e+09	0.00203139	0.0100246		-17.3229					-16.1002
WS-1@14	4	1.05583	2079229000	0.139702	4222427	0.140054	1.96929e+09	0.00203077	0.00798761		-17.6248					-16.4024
WS-1@15	4	1.05231	2085203000	0.139132	4234759	0.136063	1.98155e+09	0.00203086	0.00844702		-17.5779					-16.3554
WS-1@16	4	1.05059	2088926000	0.158857	4243703	0.15321	1.98834e+09	0.00203153	0.00814239		-17.2567					-16.0338
WS-1@17	4	1.05168	2069312000	0.153579	4203389	0.151398	1.96762e+09	0.00203138	0.00615088		-17.3278					-16.105
WS-1@18	5	1.04777	2073179000	0.129675	4210654	0.128037	1.97866e+09	0.00203074	0.00940567		-17.6398					-16.4174
WS-1@19	5	1.0599	2078985000	0.157037	4221399	0.153353	1.9615e+09	0.00203051	0.0101046		-17.7477					-16.5254
WS-1@20	5	1.07085	2087851000	0.142966	4239568	0.140548	1.94972e+09	0.00203069	0.00740293		-17.6616					-16.4392
WS-1@21	5	1.04707	2027671000	0.131938	4118007	0.129498	1.93653e+09	0.00203075	0.00923514		-17.6321					-16.4097
WS-1@22	5	1.05278	2064274000	0.124821	4191234	0.120197	1.96079e+09	0.00203037	0.00925362		-17.8169					-16.5947
WS-1@23	5	1.04245	2064130000	0.178651	4190227	0.175032	1.98008e+09	0.0020299	0.00616053		-18.0418					-16.8199
WS-1@24	5	1.03987	2060404000	0.171418	4184806	0.168984	1.98141e+09	0.0020309	0.00629146		-17.558					-16.3356
WS-1@25	5	1.04785	2057233000	0.121539	4179212	0.119561	1.96329e+09	0.00203147	0.00725753		-17.2823					-16.0595
		Primary ion beam	16O/Coeff		18O/Coeff		Secondary yield	18O/16O			δ18Ouncorrected					δ18Ocorrected by VS001/1-A
Session3	Fragments	nA	L'2		H'2		16O cps/primary ion	H'2/L'2	SE(%)		‰	Average(‰)	SD(‰)		IMF VS001/1-A(‰)	‰	Average(‰)
															-1.94953
NBS18@01		1.54274	2628536000	0.192617	5296983	0.188827	1.70381e+09	0.00201519	0.00752706		-25.1616	-24.9223	0.168339			-23.2574	-23.0177
NBS18@02		1.50558	2562601000	0.176984	5164874	0.170827	1.70207e+09	0.00201548	0.00865462		-25.0174					-23.1129
NBS18@03		1.50879	2554910000	0.148161	5150540	0.142197	1.69335e+09	0.00201608	0.00688236		-24.7301					-22.825
NBS18@04		1.494	2542926000	0.175551	5126106	0.172659	1.70209e+09	0.00201583	0.00556944		-24.8496					-22.9448
NBS18@05		1.47757	2519473000	0.218984	5078456	0.216695	1.70514e+09	0.00201582	0.0067423		-24.8529					-22.9482
VS001/1-A@01		1.52326	2498691000	0.157838	5090594	0.155022	1.64036e+09	0.00203731	0.00941703		-14.4611	-14.3353	0.20507			-12.536	-12.41
VS001/1-A@02		1.54438	2528484000	0.156476	5150514	0.15158	1.63721e+09	0.00203733	0.00747986		-14.4476					-12.5224
VS001/1-A@03		1.54681	2533512000	0.170687	5161121	0.167066	1.6379e+09	0.00203714	0.00654439		-14.54					-12.615
VS001/1-A@04		1.51927	2500329000	0.1632	5095027	0.158436	1.64574e+09	0.00203777	0.00558647		-14.2347					-12.3092
VS001/1-A@05		1.51747	2503586000	0.143066	5101638	0.137382	1.64984e+09	0.00203774	0.00738451		-14.2536					-12.3281
VS001/1-A@06		1.50824	2467851000	0.151382	5028043	0.146652	1.63625e+09	0.00203733	0.00656292		-14.4476					-12.5224
VS001/1-A@07		1.49956	2503771000	0.212764	5105206	0.212568	1.66967e+09	0.0020387	0.00769347		-13.7892					-11.8628
VS001/1-A@08		1.5073	2464111000	0.151002	5020047	0.148309	1.63478e+09	0.00203727	0.00600988		-14.4795					-12.5544
VS001/1-A@09		1.49619	2445495000	0.167304	4983145	0.166955	1.63448e+09	0.00203768	0.00564887		-14.2783					-12.3528
VS001/1-A@10		1.48454	2425689000	0.200497	4941608	0.196099	1.63397e+09	0.0020372	0.00786095		-14.5119					-12.5869
VS001/1-A@11		1.58976	2539725000	0.168514	5175093	0.164194	1.59756e+09	0.00203777	0.00635251		-14.2386					-12.3131
VS001/1-A@12		1.58178	2539440000	0.170659	5174240	0.169018	1.60543e+09	0.00203755	0.00683387		-14.3421					-12.4168
WS-1@01	6	1.53515	2606565000	0.168459	5289664	0.16699	1.69792e+09	0.00202936	0.00688539		-18.3035	-18.1223	0.208582			-16.3859	-16.2043
WS-1@02	6	1.54243	2609989000	0.188794	5296924	0.186328	1.69213e+09	0.00202948	0.00559466		-18.2455					-16.3278
WS-1@03	6	1.53899	2608412000	0.169826	5293731	0.165441	1.69489e+09	0.00202939	0.00778421		-18.2909					-16.3733
WS-1@04	6	1.53085	2572303000	0.145408	5220779	0.139529	1.68031e+09	0.00202962	0.0103191		-18.1811					-16.2633
WS-1@05	6	1.50941	2564765000	0.154216	5204459	0.153608	1.69918e+09	0.00202953	0.00647767		-18.2227					-16.305
WS-1@06	6	1.5267	2595705000	0.182681	5269211	0.177141	1.7002e+09	0.00202983	0.00665797		-18.0752					-16.1571
WS-1@07	6	1.53038	2599840000	0.221131	5278081	0.217802	1.69882e+09	0.00203023	0.00548866		-17.8841					-15.9657
WS-1@08	6	1.51027	2539091000	0.192934	5154180	0.189617	1.68121e+09	0.00202993	0.00721353		-18.0278					-16.1096
WS-1@09	6	1.50965	2550267000	0.15646	5176027	0.151303	1.68931e+09	0.00202978	0.0084719		-18.1037					-16.1857
WS-1@10	6	1.50433	2541225000	0.191498	5159346	0.188048	1.68927e+09	0.00203026	0.00805372		-17.8686					-15.9502
WS-1@11	7	1.49971	2522557000	0.171781	5121734	0.167413	1.68203e+09	0.00203019	0.00632397		-17.901					-15.9827
WS-1@12	7	1.49455	2535953000	0.163295	5147819	0.159665	1.6968e+09	0.00202994	0.00555771		-18.0244					-16.1063
WS-1@13	7	1.48352	2532639000	0.165897	5141237	0.16171	1.70718e+09	0.00203013	0.00767925		-17.9334					-16.0151
WS-1@14	7	1.4922	2544754000	0.143039	5166852	0.141843	1.70537e+09	0.00203053	0.00747341		-17.7366					-15.8179
WS-1@15	7	1.49275	2508055000	0.19446	5092343	0.188512	1.68016e+09	0.0020304	0.0102237		-17.8023					-15.8838
WS-1@16	7	1.49299	2514394000	0.164513	5103801	0.16103	1.68414e+09	0.00202972	0.00702496		-18.1294					-16.2114
WS-1@17	7	1.49682	2529244000	0.191382	5134194	0.184163	1.68975e+09	0.00202994	0.0095185		-18.0258					-16.1077
WS-1@18	7	1.50863	2537188000	0.180776	5150734	0.175197	1.68178e+09	0.0020301	0.00855823		-17.9475					-16.0292
WS-1@19	7	1.50386	2531086000	0.191195	5136209	0.190059	1.68306e+09	0.00202934	0.00679522		-18.3127					-16.3951
WS-1@20	7	1.4976	2540179000	0.137704	5161659	0.147134	1.69617e+09	0.00203025	0.00874395		-17.8759					-15.9575
WS-1@21	8	1.5001	2531166000	0.160082	5140028	0.1549	1.68733e+09	0.00203034	0.0128131		-17.8285					-15.91
WS-1@22	8	1.49877	2523720000	0.149785	5122990	0.145032	1.68386e+09	0.00202994	0.00674785		-18.0253					-16.1072
WS-1@23	8	1.48383	2525712000	0.179135	5125035	0.175859	1.70215e+09	0.0020293	0.00670485		-18.3345					-16.4169
WS-1@24	8	1.49338	2532094000	0.173555	5139046	0.171673	1.69555e+09	0.00202957	0.00709637		-18.2058					-16.288
WS-1@25	8	1.5152	2554682000	0.161347	5185193	0.155256	1.68603e+09	0.00202983	0.00941547		-18.0795					-16.1615
WS-1@26	8	1.50832	2538823000	0.1381	5152433	0.136389	1.68321e+09	0.00202946	0.00726172		-18.2575					-16.3399
WS-1@27	8	1.51207	2640249000	1.22133	5358523	1.21909	1.74611e+09	0.00202996	0.00768431		-18.0123					-16.0941
WS-1@28	8	1.69169	2529682000	0.169764	5133433	0.165797	1.49536e+09	0.00202928	0.00698705		-18.3427					-16.4252
WS-1@29	8	1.50988	2552813000	0.190177	5181347	0.186553	1.69074e+09	0.00202966	0.00806073		-18.1579					-16.24
WS-1@30	8	1.50652	2512918000	0.151892	5100879	0.150731	1.66803e+09	0.00202978	0.00660532		-18.0998					-16.1819
WS-1@31	8	1.49588	2515801000	0.144883	5106345	0.141519	1.68182e+09	0.00202961	0.00760616		-18.1826					-16.2647
WS-1@32	9	1.50941	2566463000	0.231797	5208739	0.230273	1.7003e+09	0.00202954	0.00728844		-18.2174					-16.2996
WS-1@33	9	1.54047	2563381000	0.200865	5203183	0.200526	1.66402e+09	0.00202981	0.00659718		-18.0858					-16.1678
WS-1@34	9	1.56934	2601959000	0.186653	5279697	0.186955	1.658e+09	0.00202895	0.00878955		-18.5047					-16.5876
WS-1@35	9	1.56668	2608321000	0.167197	5293393	0.167086	1.66487e+09	0.00202943	0.00548071		-18.273					-16.3554
WS-1@36	9	1.56817	2610167000	0.166033	5298704	0.163356	1.66447e+09	0.00203003	0.00803954		-17.9823					-16.0641
WS-1@37	9	1.56003	2601625000	0.154604	5279751	0.154002	1.66768e+09	0.00202925	0.00756066		-18.3596					-16.4421
WS-1@38	9	1.57278	2617733000	0.208819	5311538	0.207237	1.6644e+09	0.00202912	0.00547133		-18.4225					-16.5052
WS-1@39	9	1.56347	2611588000	0.17619	5301132	0.173856	1.67038e+09	0.00202976	0.00777933		-18.1129					-16.195
WS-1@40	9	1.57497	2600505000	0.188485	5280242	0.184677	1.65114e+09	0.00203047	0.0078613		-17.768					-15.8494
WS-1@41	9	1.5792	2626672000	0.182683	5330792	0.180303	1.6633e+09	0.00202942	0.00546144		-18.2759					-16.3583
WS-1@42	9	1.57051	2625504000	0.190407	5325870	0.189221	1.67175e+09	0.00202851	0.00747506		-18.7142					-16.7974
		Primary ion beam	16O/Coeff		18O/Coeff		Secondary yield	18O/16O			δ18Ouncorrected					δ18Ocorrected by VS001/1-A
Session4	Fragments	nA	L'2		H'2		16O cps/primary ion	H'2/L'2	SE(%)		‰	Average(‰)	SD(‰)		IMF VS001/1-A(‰)	‰	Average(‰)
															-1.53626
NBS18@01		1.55197	2565402000	0.181234	5171035	0.179424	1.653e+09	0.00201555	0.00989413		-24.984	-24.8914	0.178021			-23.4838	-23.391
NBS18@03		1.49674	2556747000	0.143565	5154228	0.139469	1.70821e+09	0.00201601	0.00555421		-24.7605					-23.26
NBS18@04		1.49134	2547157000	0.191672	5135957	0.189948	1.70796e+09	0.00201635	0.00581256		-24.5985					-23.0977
NBS18@05		1.44965	2485846000	0.188856	5011190	0.183147	1.7148e+09	0.00201562	0.0116261		-24.9531					-23.4528
NBS18@06		1.44691	2439334000	0.173146	4915631	0.17039	1.6859e+09	0.00201537	0.0075821		-25.0726					-23.5725
NBS18@07		1.41679	2440378000	0.108893	4921508	0.121625	1.72247e+09	0.00201537	0.0056841		-25.0735					-23.5735
NBS18@08		1.42023	2450248000	0.152215	4939330	0.150469	1.72525e+09	0.00201594	0.00609919		-24.7973					-23.2968
VS001/1-A@01		1.54485	2498675000	0.183369	5093344	0.181185	1.61742e+09	0.00203842	0.00627862		-13.9222	-13.9272	0.220278			-12.405	-12.41
VS001/1-A@02		1.54071	2500740000	0.156204	5095950	0.150696	1.62311e+09	0.00203778	0.00788205		-14.2318					-12.7151
VS001/1-A@03		1.53093	2432142000	0.14544	4956524	0.14282	1.58867e+09	0.00203803	0.00753642		-14.1094					-12.5925
VS001/1-A@04		1.50003	2430131000	0.144834	4953936	0.137774	1.62006e+09	0.00203855	0.0111577		-13.8593					-12.342
VS001/1-A@05		1.48931	2441886000	0.151288	4978151	0.147662	1.63961e+09	0.00203874	0.00650792		-13.7679					-12.2505
VS001/1-A@07		1.49056	2432608000	0.160787	4959975	0.155624	1.63201e+09	0.00203896	0.00739893		-13.6624					-12.1448
VS001/1-A@08		1.48242	2425024000	0.179985	4942482	0.174036	1.63585e+09	0.00203825	0.00824942		-14.0025					-12.4854
VS001/1-A@09		1.45794	2384224000	0.167056	4860360	0.164638	1.63534e+09	0.00203864	0.00721697		-13.8143					-12.297
VS001/1-A@10		1.43924	2403072000	0.107871	4898209	0.108494	1.66968e+09	0.00203837	0.00569767		-13.944					-12.4268
VS001/1-A@11		1.44988	2395914000	0.173279	4884553	0.168424	1.65249e+09	0.00203855	0.012316		-13.8588					-12.3415
VS001/1-A@12		1.44745	2372119000	0.148339	4837324	0.149668	1.63882e+09	0.00203924	0.00828416		-13.5251					-12.0072
VS001/1-A@13		1.40458	2317209000	0.222922	4721511	0.219322	1.64975e+09	0.00203758	0.00650183		-14.3286					-12.812
VS001/1-A@14		1.42727	2384180000	0.169171	4858943	0.166601	1.67045e+09	0.0020382	0.00686321		-14.0272					-12.5101
WS-1@01	10	1.55768	2616609000	0.192881	5313782	0.186975	1.67981e+09	0.00203079	0.00924878		-17.6117	-17.8144	0.184419			-16.1002	-16.3031
WS-1@02	10	1.56073	2583292000	0.152681	5245471	0.146525	1.65518e+09	0.00203054	0.00802117		-17.7336					-16.2223
WS-1@03	10	1.5587	2575227000	0.175043	5227656	0.171485	1.65216e+09	0.00202998	0.00580415		-18.005					-16.4941
WS-1@04	10	1.54423	2578672000	0.12829	5235341	0.125815	1.66988e+09	0.00203018	0.00596097		-17.9102					-16.3991
WS-1@05	10	1.52819	2567257000	0.178863	5212407	0.173416	1.67993e+09	0.00203048	0.00682737		-17.7651					-16.2538
WS-1@06	10	1.54016	2569309000	0.171453	5216060	0.164509	1.66821e+09	0.00203015	0.00657683		-17.9238					-16.4127
WS-1@07	10	1.53249	2586395000	0.186075	5250740	0.182417	1.68771e+09	0.00203029	0.0117162		-17.8565					-16.3454
WS-1@08	10	1.53406	2545743000	0.144473	5168666	0.137631	1.65949e+09	0.00203032	0.0106092		-17.8406					-16.3294
WS-1@09	11	1.54751	2568840000	0.176144	5215394	0.171838	1.65998e+09	0.00203025	0.00672456		-17.872					-16.3609
WS-1@10	11	1.53124	2565740000	0.170762	5209776	0.165021	1.6756e+09	0.00203052	0.0072517		-17.7443					-16.233
WS-1@11	11	1.51888	2550452000	0.151128	5177730	0.144002	1.67917e+09	0.00203001	0.00956003		-17.992					-16.481
WS-1@12	11	1.5138	2541312000	0.135961	5160063	0.132217	1.67877e+09	0.00203047	0.00745231		-17.7661					-16.2548
WS-1@13	11	1.51333	2532862000	0.176495	5142885	0.173666	1.67371e+09	0.00203046	0.00581793		-17.7704					-16.2591
WS-1@14	11	1.51043	2553543000	0.182862	5183998	0.17778	1.69061e+09	0.00203001	0.00743532		-17.99					-16.4791
WS-1@15	11	1.46983	2489103000	0.181949	5054020	0.177882	1.69346e+09	0.00203046	0.0080174		-17.7723					-16.2611
WS-1@16	11	1.4674	2505928000	0.169721	5088457	0.165331	1.70773e+09	0.00203057	0.0109473		-17.7191					-16.2078
WS-1@17	12	1.46732	2502045000	0.186195	5080611	0.180953	1.70517e+09	0.00203059	0.00762452		-17.7119					-16.2005
WS-1@18	12	1.49533	2507344000	0.155557	5091337	0.151918	1.67678e+09	0.00203071	0.00840097		-17.65					-16.1385
WS-1@19	12	1.48219	2507496000	0.126195	5091938	0.124883	1.69175e+09	0.0020307	0.00610329		-17.6543					-16.1428
WS-1@20	12	1.48657	2533010000	0.204288	5143507	0.201025	1.70393e+09	0.00203059	0.00692963		-17.7085					-16.1971
WS-1@21	12	1.49314	2518347000	0.155674	5112073	0.151795	1.68661e+09	0.00203004	0.00869113		-17.9736					-16.4626
WS-1@22	12	1.47945	2500480000	0.127949	5076889	0.120767	1.69014e+09	0.00203037	0.00689695		-17.8164					-16.3052
WS-1@23	12	1.4793	2478810000	0.143656	5032663	0.138282	1.67567e+09	0.00203041	0.00669804		-17.798					-16.2867
WS-1@24	12	1.48023	2479188000	0.171703	5032584	0.167359	1.67486e+09	0.00203003	0.00772311		-17.9818					-16.4708
WS-1@25	13	1.46568	2479762000	0.127695	5035540	0.126454	1.69188e+09	0.00203071	0.00561937		-17.6509					-16.1395
WS-1@26	13	1.46318	2454541000	0.226527	4986415	0.226355	1.67754e+09	0.00203124	0.0082032		-17.3979					-15.8861
WS-1@27	13	1.46717	2495225000	0.144943	5066447	0.141363	1.70071e+09	0.00203049	0.00664344		-17.7574					-16.246
WS-1@28	13	1.47264	2488277000	0.157879	5053874	0.1544	1.68967e+09	0.0020309	0.00774345		-17.5605					-16.0489
WS-1@29	13	1.46396	2497857000	0.174699	5073110	0.169036	1.70623e+09	0.00203133	0.0122137		-17.35					-15.8381
WS-1@30	13	1.46013	2477165000	0.161767	5030102	0.158656	1.69654e+09	0.00203066	0.00562241		-17.6741					-16.1627
WS-1@31	13	1.47053	2496540000	0.148299	5068601	0.151535	1.69771e+09	0.00203025	0.00753227		-17.8749					-16.3638
WS-1@32	13	1.48148	2499166000	0.167984	5074077	0.164628	1.68693e+09	0.00203023	0.00639914		-17.8846					-16.3735
WS-1@33	14	1.4789	2491261000	0.1615	5057976	0.157509	1.68453e+09	0.00203029	0.00593143		-17.8551					-16.3439
WS-1@34	14	1.47875	2488100000	0.141623	5053252	0.134435	1.68257e+09	0.00203074	0.00783116		-17.6384					-16.1269
WS-1@35	14	1.47202	2484720000	0.172757	5043801	0.16913	1.68797e+09	0.00202993	0.00613572		-18.0297					-16.5188
WS-1@36	14	1.4505	2475236000	0.206564	5024819	0.201406	1.70646e+09	0.00202993	0.00838634		-18.0316					-16.5208
WS-1@37	14	1.45277	2475429000	0.175152	5026545	0.169382	1.70393e+09	0.00203058	0.00829767		-17.7158					-16.2044
WS-1@38	14	1.44221	2457132000	0.158294	4988391	0.154719	1.70372e+09	0.00203004	0.00564588		-17.9736					-16.4626
WS-1@39	14	1.44002	2454467000	0.169117	4982722	0.167336	1.70446e+09	0.00203006	0.00944201		-17.9644					-16.4534
WS-1@40	14	1.44002	2442116000	0.16784	4957917	0.165681	1.69589e+09	0.00203024	0.00566321		-17.8778					-16.3667
WS-1@41	15	1.44589	2449174000	0.219862	4971159	0.217343	1.69389e+09	0.00202973	0.00881732		-18.126					-16.6152
WS-1@42	15	1.44667	2451224000	0.159225	4979042	0.156242	1.69439e+09	0.00203132	0.00568621		-17.3578					-15.8459
WS-1@43	15	1.44386	2454361000	0.203917	4981418	0.203288	1.69987e+09	0.00202962	0.00564983		-18.1792					-16.6685
WS-1@44	15	1.43149	2464147000	0.189934	5002191	0.191821	1.72138e+09	0.00203009	0.00579113		-17.9504					-16.4394
WS-1@45	15	1.43815	2447769000	0.1872	4970234	0.184322	1.70203e+09	0.0020306	0.00576786		-17.7051					-16.1937
WS-1@46	15	1.43775	2465636000	0.179118	5006114	0.176142	1.71492e+09	0.00203041	0.00563587		-17.7946					-16.2834
WS-1@47	15	1.43236	2425155000	0.142546	4920280	0.126409	1.69312e+09	0.00203038	0.00802002		-17.8101					-16.2989
WS-1@48	15	1.42132	2435946000	0.155125	4945209	0.152667	1.71386e+09	0.00203018	0.00635372		-17.9102					-16.3991
WS-1@49	15	1.41069	2434116000	0.154223	4941885	0.145939	1.72548e+09	0.00203039	0.00851034		-17.8048					-16.2935
WS-1@50	16	1.41577	2430168000	0.158305	4934785	0.15711	1.7165e+09	0.00203073	0.00721843		-17.6442					-16.1327
WS-1@51	16	1.40716	2414964000	0.12701	4903664	0.12484	1.71619e+09	0.00203053	0.00690758		-17.737					-16.2257
WS-1@52	16	1.38565	2415824000	0.178072	4905840	0.169983	1.74346e+09	0.00203059	0.00984702		-17.7114					-16.2
WS-1@53	16	1.40192	2424184000	0.13157	4922199	0.130407	1.72918e+09	0.00203054	0.00679044		-17.7351					-16.2238
WS-1@54	16	1.38143	2417117000	0.145114	4907864	0.139288	1.74972e+09	0.00203057	0.00840164		-17.7177					-16.2063
WS-1@55	16	1.39481	2407245000	0.142492	4885836	0.138415	1.72586e+09	0.00202959	0.00996498		-18.1922					-16.6816
WS-1@56	16	1.39559	2423897000	0.176267	4920302	0.17229	1.73683e+09	0.00202991	0.00568483		-18.0394					-16.5285
WS-1@57	16	1.40192	2415721000	0.18969	4902666	0.187376	1.72315e+09	0.00202958	0.00684103		-18.199					-16.6884
high-Mg calcite@01		1.33026	2461751000	0.198082	5072749	0.19373	1.85057e+09	0.00206046	0.00652809		-3.25997	-3.23478	0.852729			-1.72635	-1.70113
high-Mg calcite@02		1.35874	2450806000	0.191417	5050888	0.186486	1.80373e+09	0.00206091	0.00825865		-3.0418					-1.50785
high-Mg calcite@03		1.38362	2454153000	0.172916	5056633	0.17051	1.77372e+09	0.00206052	0.00629583		-3.23094					-1.69728
high-Mg calcite@04		1.34552	2420036000	0.16547	4984801	0.166323	1.79859e+09	0.0020598	0.00924666		-3.57779					-2.04466
high-Mg calcite@05		1.36328	2457864000	0.215682	5063372	0.210946	1.80291e+09	0.00205996	0.00845319		-3.50184					-1.9686
high-Mg calcite@06		1.35514	2472343000	0.205417	5093416	0.200751	1.82442e+09	0.00206028	0.00818787		-3.34656					-1.81308
high-Mg calcite@07		1.35451	2455610000	0.165404	5060117	0.161624	1.81291e+09	0.00206078	0.00852605		-3.1042					-1.57035
high-Mg calcite@08		1.35256	2458867000	0.169779	5065187	0.166484	1.81794e+09	0.00205987	0.00560297		-3.54634					-2.01317
high-Mg calcite@09		1.35991	2459995000	0.184353	5067778	0.184679	1.80894e+09	0.00206019	0.00902358		-3.39058					-1.85716
high-Mg calcite@10		1.35983	2477503000	0.187344	5103706	0.182843	1.82191e+09	0.00206002	0.00693612		-3.47185					-1.93856
high-Mg calcite@11		1.36469	2474431000	0.19341	5097013	0.189237	1.81319e+09	0.00205979	0.00687108		-3.58456					-2.05145
high-Mg calcite@12		1.34403	2447239000	0.186943	5042406	0.18417	1.82082e+09	0.00206045	0.0062513		-3.26577					-1.73217
high-Mg calcite@13		1.35389	2447913000	0.153155	5043480	0.147803	1.80806e+09	0.00206033	0.00561502		-3.32575					-1.79224
high-Mg calcite@14		1.36124	2462437000	0.174262	5072414	0.169577	1.80896e+09	0.00205984	0.00576769		-3.56182					-2.02867
high-Mg calcite@15		1.36586	2474200000	0.143821	5098030	0.141485	1.81146e+09	0.0020606	0.00558488		-3.19418					-1.66046
high-Mg calcite@16		1.36735	2474314000	0.163383	5097717	0.156853	1.80958e+09	0.00206011	0.00785875		-3.42928					-1.89592
high-Mg calcite@17		1.35678	2428787000	0.17256	5006798	0.166844	1.79011e+09	0.00206124	0.00677344		-2.88264					-1.34845
high-Mg calcite@18		1.34779	2442278000	0.160125	5033310	0.157895	1.81206e+09	0.00206096	0.0056207		-3.01664					-1.48265
high-Mg calcite@19		1.36351	2454293000	0.146657	5055813	0.143161	1.79998e+09	0.00205999	0.00715353		-3.48829					-1.95503
high-Mg calcite@20		1.34646	2445204000	0.1342	5036319	0.131662	1.81603e+09	0.00205967	0.00657931		-3.64116					-2.10813
high-Mg calcite@21		1.33363	2424451000	0.26535	4994892	0.260606	1.81794e+09	0.00206022	0.00767571		-3.37703					-1.8436
high-Mg calcite@22		1.32682	2410911000	0.150393	4970179	0.144359	1.81706e+09	0.00206167	0.00747097		-2.6756					-1.14109
high-Mg calcite@23		1.32095	2417358000	0.186862	4982017	0.182015	1.83001e+09	0.00206094	0.00947766		-3.0297					-1.49573
high-Mg calcite@24		1.32588	2418630000	0.185826	4986080	0.178958	1.82417e+09	0.00206142	0.00837646		-2.79412					-1.25979
high-Mg calcite@25		1.30578	2427183000	0.157608	5001056	0.155633	1.8588e+09	0.00206032	0.00738957		-3.32914					-1.79563
high-Mg calcite@26		1.33144	2420188000	0.175204	4986662	0.173213	1.81773e+09	0.00206051	0.00564694		-3.23675					-1.7031
high-Mg calcite@27		1.3179	2416470000	0.151659	4980116	0.148469	1.83357e+09	0.00206091	0.00831723		-3.04421					-1.51027
high-Mg calcite@28		1.31305	2414278000	0.198228	4977200	0.195086	1.83868e+09	0.00206157	0.00565231		-2.72349					-1.18905
high-Mg calcite@29		1.3262	2405262000	0.130275	4958882	0.124086	1.81365e+09	0.00206154	0.00773816		-2.73655					-1.20213
		Primary ion beam	16O/Coeff		18O/Coeff		Secondary yield	18O/16O		δ18Ouncorrected	δ18Ouncorrected					δ18Ocorrected by VS001/1-A
Session5	Fragments	nA	L'2		H'2		16O cps/primary ion	H'2/L'2	SE(%)	‰	Drift calibration	Average(‰)	SD(‰)		IMF VS001/1-A(‰)	‰	Average(‰)
VS001/1-A@01		1.9914	2302136000	0.200542	4707217	0.197551	1.15604e+09	0.00204472	0.0103352	-10.8746	-10.8746	-10.8455	0.260231		1.58416	-12.4391	-12.41
VS001/1-A@02		1.98224	2302136000	0.211072	4644464	0.207987	1.16138e+09	0.00204467	0.00960494	-10.9003	-10.898					-12.4624
VS001/1-A@03		1.99468	2302136000	0.166703	4660638	0.163065	1.15414e+09	0.00204543	0.00894902	-10.5297	-10.5067					-12.0717
VS001/1-A@04		1.97004	2302136000	0.168084	4635876	0.161594	1.16857e+09	0.00204418	0.0102178	-11.1373	-11.0936					-12.6577
VS001/1-A@05		2.1416	2302136000	0.187159	5019913	0.181172	1.07496e+09	0.00204427	0.0111796	-11.0904	-11.0237					-12.5879
VS001/1-A@06		2.13878	2302136000	0.209281	4883468	0.200068	1.07638e+09	0.00204538	0.0103256	-10.5549	-10.4675					-12.0326
VS001/1-A@07		2.15498	2302136000	0.232827	4997088	0.227739	1.06829e+09	0.00204405	0.0070946	-11.1978	-11.0943					-12.6584
VS001/1-A@08		2.19793	2302136000	0.16504	5104127	0.161015	1.04741e+09	0.00204416	0.00888484	-11.145	-11.0208					-12.5851
VS001/1-A@09		2.26309	2302136000	0.207247	5240668	0.203086	1.01725e+09	0.00204503	0.00743845	-10.7247	-10.5821					-12.147
VS001/1-A@10		2.33937	2302136000	0.196743	5315636	0.189264	9.84084e+08	0.00204486	0.009403	-10.8064	-10.6431					-12.2079
VS001/1-A@11		2.39601	2302136000	0.275217	5556507	0.274127	9.60821e+08	0.00204366	0.00776343	-11.3879	-11.2062					-12.7701
VS001/1-A@12		2.36315	2302136000	0.241152	5311425	0.239845	9.7418e+08	0.00204484	0.00636029	-10.8166	-10.6188					-12.1836
VS001/1-A@13		2.32044	2302136000	0.249669	5361086	0.244327	9.92113e+08	0.00204369	0.010588	-11.3748	-11.1632					-12.7272
VS001/1-A@14		2.2487	2302136000	0.221473	5082275	0.216991	1.02376e+09	0.00204472	0.00740424	-10.8746	-10.6446					-12.2094
ws-1@01	17	1.97622	2302136000	0.16973	4812641	0.16627	1.16492e+09	0.00203615	0.0061177	-15.0179	-15.011	-15.0661	0.158308			-16.5689	-16.6239
ws-1@02	17	1.97653	2302136000	0.189686	4754880	0.188144	1.16473e+09	0.0020366	0.0085991	-14.8017	-14.7925					-16.3507
ws-1@03	17	1.97497	2302136000	0.220918	4775448	0.215281	1.16566e+09	0.00203688	0.00801198	-14.6686	-14.6571					-16.2156
ws-1@04	17	1.98803	2302136000	0.55859	4951343	0.55533	1.158e+09	0.00203594	0.00620147	-15.1229	-15.1091					-16.6668
ws-1@05	17	2.03638	2302136000	0.18914	4812616	0.187661	1.1305e+09	0.00203632	0.00932044	-14.939	-14.9229					-16.481
ws-1@06	17	2.02308	2302136000	0.187992	4863196	0.184921	1.13794e+09	0.00203583	0.00651109	-15.1756	-15.1572					-16.7149
ws-1@07	17	2.00477	2302136000	0.162598	4793906	0.16258	1.14833e+09	0.00203579	0.0110171	-15.1925	-15.1718					-16.7295
ws-1@08	17	1.9932	2302136000	0.180103	4824475	0.178654	1.155e+09	0.00203579	0.00596411	-15.1969	-15.1716					-16.7292
ws-1@09	18	1.98874	2302136000	0.223131	4794132	0.218298	1.15759e+09	0.00203559	0.00843955	-15.2922	-15.2646					-16.8221
ws-1@10	18	2.00884	2302136000	0.170058	4831082	0.168626	1.146e+09	0.00203588	0.00781431	-15.1519	-15.122					-16.6797
ws-1@11	18	1.99648	2302136000	0.18843	4799340	0.183011	1.1531e+09	0.00203597	0.00833096	-15.1074	-15.0752					-16.633
ws-1@12	18	1.99202	2302136000	0.190318	4744480	0.187793	1.15568e+09	0.00203641	0.00781606	-14.8931	-14.8586					-16.4167
ws-1@13	18	1.99202	2302136000	0.210868	4839095	0.209534	1.15568e+09	0.00203652	0.00582466	-14.8389	-14.8021					-16.3604
ws-1@14	18	1.98123	2302136000	0.202062	4752163	0.196867	1.16197e+09	0.00203648	0.00580972	-14.8602	-14.8211					-16.3793
ws-1@15	18	1.99007	2302136000	0.154073	4821471	0.151788	1.15681e+09	0.0020369	0.00808533	-14.6561	-14.6147					-16.1732
ws-1@16	18	2.00211	2302136000	0.19462	4805123	0.188352	1.14985e+09	0.00203598	0.00942739	-15.103	-15.0547					-16.6126
ws-1@17	19	2.01761	2302136000	0.155558	4865627	0.152178	1.14102e+09	0.00203584	0.00563496	-15.1703	-15.1197					-16.6774
ws-1@18	19	2.00509	2302136000	0.170307	4823233	0.165836	1.14815e+09	0.00203583	0.00565965	-15.1771	-15.1242					-16.6819
ws-1@19	19	2.00603	2302136000	0.244643	4878085	0.242044	1.14761e+09	0.00203611	0.00774929	-15.0372	-14.982					-16.54
ws-1@20	19	2.02504	2302136000	0.184473	4837011	0.181989	1.13684e+09	0.00203599	0.00978034	-15.0963	-15.0388					-16.5966
ws-1@21	19	2.02793	2302136000	0.213815	4909062	0.21048	1.13521e+09	0.00203586	0.00687864	-15.1582	-15.0984					-16.6562
ws-1@22	19	2.04334	2302136000	0.269431	5007263	0.263815	1.12665e+09	0.00203615	0.00674483	-15.0179	-14.9558					-16.5138
ws-1@23	19	2.10178	2302136000	0.259344	5160812	0.252731	1.09533e+09	0.00203573	0.0113554	-15.2211	-15.1567					-16.7144
ws-1@24	20	2.15146	2302136000	0.24826	5102651	0.246525	1.07003e+09	0.00203578	0.00786784	-15.1988	-15.1298					-16.6875
ws-1@25	20	2.14629	2302136000	0.232111	5166533	0.229769	1.07261e+09	0.00203614	0.00580974	-15.0261	-14.9548					-16.5128
ws-1@26	20	2.15717	2302136000	0.168638	5164189	0.166143	1.0672e+09	0.00203596	0.00754015	-15.1132	-15.0396					-16.5975
ws-1@27	20	2.1355	2302136000	0.223996	5121465	0.222268	1.07803e+09	0.0020359	0.00549256	-15.1432	-15.0673					-16.6251
ws-1@28	20	2.14262	2302136000	0.211211	5180806	0.205198	1.07445e+09	0.00203565	0.0083684	-15.2636	-15.1854					-16.7431
ws-1@29	20	2.14371	2302136000	0.146881	5112089	0.1409	1.0739e+09	0.00203604	0.00781182	-15.074	-14.9935					-16.5515
ws-1@30	20	2.13315	2302136000	0.214937	5078933	0.208573	1.07922e+09	0.00203548	0.00952813	-15.3464	-15.2636					-16.8211
ws-1@31	20	2.13065	2302136000	0.173036	5066526	0.168436	1.08049e+09	0.00203564	0.00847121	-15.2661	-15.1764					-16.734
ws-1@32	21	2.133	2302136000	0.230696	4962899	0.226542	1.0793e+09	0.00203533	0.0104609	-15.417	-15.325					-16.8824
ws-1@33	21	2.12799	2302136000	0.217795	4995994	0.214407	1.08184e+09	0.00203557	0.00724702	-15.3023	-15.208					-16.7656
ws-1@34	21	2.10867	2302136000	0.137584	4974958	0.13452	1.09175e+09	0.0020366	0.00662907	-14.8036	-14.707					-16.2654
ws-1@35	21	2.12595	2302136000	0.244969	5023976	0.240034	1.08287e+09	0.00203611	0.00833306	-15.0387	-14.9398					-16.4978
ws-1@36	21	2.13526	2302136000	0.173044	5140817	0.170723	1.07815e+09	0.00203626	0.00794498	-14.9657	-14.8645					-16.4226
ws-1@37	21	2.16093	2302136000	0.222243	5094621	0.219885	1.06535e+09	0.00203614	0.00848482	-15.0252	-14.9171					-16.4751
ws-1@38	21	2.14536	2302136000	0.212519	4997262	0.205091	1.07308e+09	0.00203645	0.00952375	-14.8766	-14.7662					-16.3245
ws-1@39	21	2.13566	2302136000	0.169815	5110717	0.163777	1.07795e+09	0.00203616	0.00835887	-15.0174	-14.9047					-16.4628
ws-1@40	22	2.12525	2302136000	0.249094	5023542	0.245694	1.08323e+09	0.00203561	0.00953288	-15.2806	-15.1656					-16.7232
ws-1@41	22	2.14489	2302136000	0.288955	5083725	0.289454	1.07331e+09	0.00203548	0.00872652	-15.3459	-15.2286					-16.7861
ws-1@42	22	2.16961	2302136000	0.168257	5186406	0.164557	1.06108e+09	0.00203567	0.00845317	-15.2511	-15.1315					-16.6892
ws-1@43	22	2.17524	2302136000	0.182056	5151253	0.177056	1.05834e+09	0.00203584	0.0106359	-15.1693	-15.0474					-16.6053
ws-1@44	22	2.20176	2302136000	0.224715	5283825	0.221716	1.04559e+09	0.0020355	0.0113873	-15.3352	-15.2087					-16.7663
ws-1@45	22	2.23775	2302136000	0.165304	5244193	0.161408	1.02877e+09	0.00203571	0.0103043	-15.2322	-15.1034					-16.6612
ws-1@46	22	2.23258	2302136000	0.233129	5236613	0.228208	1.03115e+09	0.0020352	0.00876164	-15.4804	-15.3493					-16.9066
ws-1@47	22	2.24995	2302136000	0.224402	5362084	0.217984	1.02319e+09	0.00203548	0.00799481	-15.3449	-15.2115					-16.7691
ws-1@48	23	2.26286	2302136000	0.198435	5331958	0.196243	1.01736e+09	0.00203568	0.00593192	-15.2496	-15.1139					-16.6717
ws-1@49	23	2.25426	2302136000	0.273229	5323432	0.269401	1.02124e+09	0.00203605	0.00661526	-15.0697	-14.9317					-16.4897
ws-1@50	23	2.27037	2302136000	0.243373	5302413	0.237082	1.01399e+09	0.00203548	0.00908705	-15.3459	-15.2056					-16.7632
ws-1@51	23	2.29353	2302136000	0.183187	5347568	0.179958	1.00375e+09	0.00203594	0.00960385	-15.1243	-14.9771					-16.5351
ws-1@52	23	2.26137	2302136000	0.217318	5279788	0.208059	1.01803e+09	0.00203562	0.011636	-15.2786	-15.1291					-16.6869
ws-1@53	23	2.2746	2302136000	0.24153	5315922	0.233381	1.01211e+09	0.00203553	0.011514	-15.3222	-15.1704					-16.728
ws-1@54	23	2.28719	2302136000	0.207608	5280231	0.203599	1.00653e+09	0.00203545	0.00699671	-15.3599	-15.2058					-16.7634
ws-1@55	23	2.27655	2302136000	0.17406	5309385	0.169507	1.01124e+09	0.00203558	0.00655872	-15.2961	-15.1397					-16.6974
ws-1@56	24	2.29142	2302136000	0.232245	5346882	0.225785	1.00468e+09	0.00203584	0.00849827	-15.1683	-15.0096					-16.5676
ws-1@57	24	2.28656	2302136000	0.16669	5581250	0.16699	1.00681e+09	0.00203524	0.00714951	-15.4586	-15.2976					-16.8551
ws-1@58	24	2.34391	2302136000	0.234435	5591408	0.232926	9.82178e+08	0.00203554	0.0052569	-15.3159	-15.1503					-16.708
ws-1@59	24	2.38537	2302136000	0.202739	5568298	0.200214	9.65106e+08	0.00203553	0.00815417	-15.3202	-15.1523					-16.71
ws-1@60	24	2.35736	2302136000	0.219009	5556020	0.212166	9.76572e+08	0.00203574	0.00996283	-15.2162	-15.046					-16.6039
ws-1@61	24	2.3655	2302136000	0.21188	5541183	0.210784	9.73213e+08	0.00203592	0.00669071	-15.1321	-14.9596					-16.5176
ws-1@62	24	2.37927	2302136000	0.234087	5624859	0.229079	9.67582e+08	0.00203568	0.00704073	-15.2477	-15.0729					-16.6307
ws-1@63	24	2.40344	2302136000	0.244618	5677576	0.239467	9.5785e+08	0.00203513	0.00738963	-15.5118	-15.3347					-16.8921
ws-1@64	24	2.38873	2302136000	0.236121	5669753	0.233458	9.63747e+08	0.00203586	0.00757591	-15.163	-14.9836					-16.5416
ws-1@65	25	2.43129	2302136000	0.242481	5662956	0.237031	9.46878e+08	0.00203544	0.00683828	-15.3638	-15.1775					-16.7351
ws-1@66	25	2.43927	2302136000	0.262372	5690199	0.2613	9.4378e+08	0.00203567	0.00838829	-15.252	-15.0634					-16.6213
ws-1@67	25	2.44443	2302136000	0.175783	5645210	0.170569	9.41787e+08	0.00203545	0.00902198	-15.357	-15.1661					-16.7238
ws-1@68	25	2.41752	2302136000	0.198828	5546470	0.195633	9.5227e+08	0.00203533	0.00974824	-15.4175	-15.2243					-16.7818
ws-1@69	25	2.39515	2302136000	0.134473	5571709	0.133798	9.61166e+08	0.00203504	0.00813122	-15.5573	-15.3618					-16.9191
ws-1@70	25	2.35509	2302136000	0.288086	5553433	0.282818	9.77513e+08	0.00203536	0.00978896	-15.4015	-15.2014					-16.759
ws-1@71	25	2.38318	2302136000	0.170248	5556602	0.165392	9.65993e+08	0.00203545	0.00696377	-15.358	-15.1556					-16.7133
ws-1@72	25	2.35768	2302136000	0.210545	5360825	0.209272	9.76442e+08	0.00203596	0.00536866	-15.1103	-14.9056					-16.4637
ws-1@73	26	2.31966	2302136000	0.290907	5444258	0.287496	9.92447e+08	0.00203541	0.00777502	-15.3797	-15.1727					-16.7304
ws-1@74	26	2.33781	2302136000	0.180617	5379569	0.175887	9.84742e+08	0.0020358	0.00655323	-15.1891	-14.9798					-16.5378
ws-1@75	26	2.31027	2302136000	0.207599	5437842	0.202918	9.9648e+08	0.002036	0.00951419	-15.0943	-14.8781					-16.4363
ws-1@76	26	2.29454	2302136000	0.227941	5343566	0.224061	1.00331e+09	0.00203603	0.0112803	-15.0759	-14.8574					-16.4156
ws-1@77	26	2.28484	2302136000	0.198695	5357587	0.192052	1.00757e+09	0.00203563	0.0106569	-15.2704	-15.0496					-16.6075
ws-1@78	26	2.25832	2302136000	0.19142	5306780	0.186531	1.0194e+09	0.00203541	0.00740464	-15.3783	-15.1552					-16.7129
ws-1@79	26	2.25605	2302136000	0.175164	5276602	0.172328	1.02043e+09	0.00203585	0.00678528	-15.1674	-14.942					-16.5
ws-1@80	26	2.24948	2302136000	0.316036	5331595	0.315756	1.02341e+09	0.00203542	0.0053783	-15.3744	-15.1467					-16.7044

## Sheet: Table S2
Table S2 The bulk isotopic analyses by IRMS
Sample	δ18OVPDB /‰	SE /‰
ws-1-1	-16.44	0.05
ws-1-2	-16.45	0.01
ws-1-3	-16.67	0.02
Mean	-16.52	0.03
SD	0.13

## Sheet: Table S3
Table S3 Summary of EPMA chemical results for the carbonate minerals
sample	CaO /wt%	MgO /wt%	SrO /wt%	CO2 /wt%	Total /wt%
WS-1a	54.0±0.57	0.10±0.02	0.06±0.04	43.9706	98.1306
Vs001/1-Ab	54.88±0.20	–	1.40±0.17	43.9706	100.25
Cal-1b	56.27 ±0.16	–	–	43.9706	99.976
NBS18c	52.79±046	0.59±0.16	0.83±0.10	43.9706	98.1806
High-Mg calcited	49.47±4.2	2.9±0.29	0.28±0.04	43.9706	96.6206
Note: The CO2 is a assumed value due to sample is coated with carbon to increase electroconductibility
a: X. Yin, M. He, L. Zhang, G. Zhu, W. Deng and G. Wei, J. Anal. At. Spectrom., 2024, 39, 1277-1283.
b: M. He, T. Chen, X. Liu, Y.-N. Yang, X. Xia, Q. Yang, P. He, J. Di, Y. Zhang and G. Wei, J. Anal. At. Spectrom., 2021, 36, 1389-1398.
c: A. P. Gajurel, C. France-Lanord, P. Huyghe, C. Guilmette and D. Gurung, Chem. Geol., 2006, 233, 156-183.
d: M. He, X. Yu, W. Deng, X. Chen, X. Peng, K. Ta, H. Xu, Z. Cui, Q. Yang, Y. Yang, Y. Zhang and G. Wei, J. Geophys. Res-Biogeo., 2024.
